# Supplementary material for: Mediterranean diet related metabolite profiles and cognitive performance in a Greek population
Source: bioRxiv or medRxiv preprint supplement (doi:10.1101/2022.09.29.22280504), 2022-09-30
Supplement: Supplementary file [file media-2.pdf]

**Supplementary Table S1.** Median and interquartile range of concentrations for the 250 metabolites quantified by nuclear magnetic resonance.

| Metabolites                   | ALL (N = 1250)          |
|-------------------------------|-------------------------|
| Total-C (mmol/l)              | 5.074 [4.451,5.719]     |
| Non-HDL-C (mmol/l)            | 3.525 [2.959,4.147]     |
| Remnant-C (mmol/l)            | 1.571 [1.307,1.886]     |
| VLDL-C (mmol/l)               | 0.647 [0.498,0.816]     |
| Clinical-LDL-C (mmol/l)       | 2.841 [2.357,3.358]     |
| LDL-C (mmol/l)                | 1.943 [1.638,2.263]     |
| HDL-C (mmol/l)                | 1.491 [1.295,1.726]     |
| Total Triglycerides (mmol/l)  | 1.002 [0.778,1.383]     |
| VLDL-TG (mmol/l)              | 0.637 [0.458,0.966]     |
| LDL-TG (mmol/l)               | 0.140 [0.120,0.166]     |
| HDL-TG (mmol/l)               | 0.117 [0.095,0.146]     |
| Total-PL (mmol/l)             | 3.101 [2.804,3.396]     |
| VLDL-PL (mmol/l)              | 0.399 [0.299,0.529]     |
| LDL-PL (mmol/l)               | 0.663 [0.571,0.769]     |
| HDL-PL (mmol/l)               | 1.660 [1.479,1.888]     |
| Total-CE (mmol/l)             | 3.711 [3.281,4.173]     |
| VLDL-CE (mmol/l)              | 0.397 [0.311,0.496]     |
| LDL-CE (mmol/l)               | 1.414 [1.192,1.651]     |
| HDL-CE (mmol/l)               | 1.164 [1.012,1.349]     |
| Total-FC (mmol/l)             | 1.354 [1.175,1.541]     |
| VLDL-FC (mmol/l)              | 0.249 [0.186,0.326]     |
| LDL-FC (mmol/l)               | 0.527 [0.451,0.611]     |
| HDL-FC (mmol/l)               | 0.329 [0.283,0.382]     |
| Total-L (mmol/l)              | 9.254 [8.223,10.40]     |
| VLDL-L (mmol/l)               | 1.705 [1.279,2.323]     |
| LDL-L (mmol/l)                | 2.751 [2.349,3.193]     |
| HDL-L (mmol/l)                | 3.279 [2.885,3.742]     |
| Total-P (mmol/l)              | 0.018 [0.017,0.020]     |
| VLDL-P (mmol/l)               | <0.001 [<0.0001,0.0001] |
| LDL-P (mmol/l)                | 0.001 [0.001,0.001]     |
| HDL-P (mmol/l)                | 0.016 [0.015,0.018]     |
| VLDL particle size (nm)       | 38.018 [37.236,38.937]  |
| LDL particle size (nm)        | 23.978 [23.906,24.030]  |
| HDL particle size (nm)        | 9.704 [9.569,9.868]     |
| Phosphoglycerides (mmol/l)    | 2.449 [2.202,2.691]     |
| TG/PG (ratio)                 | 0.413 [0.323,0.554]     |
| Total cholines (mmol/l)       | 2.786 [2.523,3.036]     |
| Phosphatidylcholines (mmol/l) | 2.276 [2.031,2.510]     |
| Sphingomyelins (mmol/l)       | 0.493 [0.448,0.537]     |
| ApoB (g/l)                    | 0.881 [0.750,1.034]     |
| ApoA1 (g/l)                   | 1.553 [1.413,1.719]     |
| ApoB/ApoA1 (ratio)            | 0.561 [0.463,0.678]     |
| Total fatty acids (mmol/l)    | 12.046 [10.711,13.697]  |
| Unsaturation (degree)         | 1.345 [1.312,1.376]     |
| Omega-3 (mmol/l)              | 0.396 [0.303,0.499]     |
| Omega-6 (mmol/l)              | 4.783 [4.325,5.298]     |
| PUFA (mmol/l)                 | 5.201 [4.686,5.745]     |
| MUFA (mmol/l)                 | 2.762 [2.385,3.288]     |
| SFA (mmol/l)                  | 4.040 [3.559,4.611]     |
| LA (mmol/l)                   | 3.793 [3.360,4.330]     |
| DHA (mmol/l)                  | 0.206 [0.175,0.242]     |

|                                      |                           |
|--------------------------------------|---------------------------|
| <b>Omega-3 (%)</b>                   | 3.227 [2.678,3.892]       |
| <b>Omega-6 (%)</b>                   | 40.124 [38.422,41.435]    |
| <b>PUFA (%)</b>                      | 43.397 [41.876,44.557]    |
| <b>MUFA (%)</b>                      | 23.046 [21.892,24.488]    |
| <b>SFA (%)</b>                       | 33.577 [32.750,34.428]    |
| <b>LA (%)</b>                        | 31.844 [30.145,33.427]    |
| <b>DHA (%)</b>                       | 1.732 [1.482,1.982]       |
| <b>PUFA/MUFA (ratio)</b>             | 1.884 [1.717,2.030]       |
| <b>Omega-6/Omega-3 (ratio)</b>       | 12.335 [10.025,15.157]    |
| <b>Alanine (mmol/l)</b>              | 0.329 [0.287,0.379]       |
| <b>Glutamine (mmol/l)</b>            | 0.607 [0.559,0.661]       |
| <b>Glycine (mmol/l)</b>              | 0.237 [0.207,0.279]       |
| <b>Histidine (mmol/l)</b>            | 0.076 [0.069,0.083]       |
| <b>Total BCAA (mmol/l)</b>           | 0.375 [0.326,0.433]       |
| <b>Isoleucine (mmol/l)</b>           | 0.047 [0.038,0.057]       |
| <b>Leucine (mmol/l)</b>              | 0.109 [0.093,0.127]       |
| <b>Valine (mmol/l)</b>               | 0.219 [0.193,0.249]       |
| <b>Phenylalanine (mmol/l)</b>        | 0.066 [0.059,0.074]       |
| <b>Tyrosine (mmol/l)</b>             | 0.059 [0.052,0.067]       |
| <b>Glucose (mmol/l)</b>              | 4.414 [4.048,4.782]       |
| <b>Lactate (mmol/l)</b>              | 2.308 [1.934,2.774]       |
| <b>Pyruvate (mmol/l)</b>             | 0.025 [0.016,0.038]       |
| <b>Citrate (mmol/l)</b>              | 0.059 [0.053,0.067]       |
| <b>Glycerol (mmol/l)</b>             | 0.094 [0.078,0.118]       |
| <b>3-Hydroxybohbutyrate (mmol/l)</b> | 0.038 [0.022,0.076]       |
| <b>Acetate (mmol/l)</b>              | 0.020 [0.014,0.027]       |
| <b>Acetoacetate (mmol/l)</b>         | 0.020 [0.014,0.034]       |
| <b>Acetone (mmol/l)</b>              | 0.016 [0.014,0.020]       |
| <b>Creatinine(μmol/l)</b>            | 65.091 [57.596,74.614]    |
| <b>Albumin (g/l)</b>                 | 42.486 [40.531,44.850]    |
| <b>Glycoprotein acetyls (mmol/l)</b> | 0.774 [0.701,0.848]       |
| <b>XXL-VLDL-P (mmol/l)</b>           | <0.0001 [<0.0001,<0.0001] |
| <b>XXL-VLDL-L (mmol/l)</b>           | 0.051 [0.014,0.157]       |
| <b>XXL-VLDL-PL (mmol/l)</b>          | 0.006 [0,0.023]           |
| <b>XXL-VLDL-C (mmol/l)</b>           | 0.021 [0.007,0.047]       |
| <b>XXL-VLDL-CE (mmol/l)</b>          | 0.014 [0.005,0.029]       |
| <b>XXL-VLDL-FC (mmol/l)</b>          | 0.007 [0.002,0.018]       |
| <b>XXL-VLDL-TG (mmol/l)</b>          | 0.025 [0.006,0.089]       |
| <b>XL-VLDL-P (mmol/l)</b>            | <0.0001 [<0.0001,<0.0001] |
| <b>XL-VLDL-L (mmol/l)</b>            | 0.124 [0.068,0.213]       |
| <b>XL-VLDL-PL (mmol/l)</b>           | 0.022 [0.011,0.039]       |
| <b>XL-VLDL-C (mmol/l)</b>            | 0.039 [0.024,0.060]       |
| <b>XL-VLDL-CE (mmol/l)</b>           | 0.025 [0.016,0.036]       |
| <b>XL-VLDL-FC (mmol/l)</b>           | 0.014 [0.008,0.024]       |
| <b>XL-VLDL-TG (mmol/l)</b>           | 0.063 [0.032,0.114]       |
| <b>L-VLDL-P (mmol/l)</b>             | <0.0001 [<0.0001,<0.0001] |
| <b>L-VLDL-L (mmol/l)</b>             | 0.245 [0.159,0.375]       |
| <b>L-VLDL-PL (mmol/l)</b>            | 0.046 [0.027,0.076]       |
| <b>L-VLDL-C (mmol/l)</b>             | 0.074 [0.047,0.111]       |
| <b>L-VLDL-CE (mmol/l)</b>            | 0.040 [0.026,0.059]       |
| <b>L-VLDL-FC (mmol/l)</b>            | 0.034 [0.021,0.052]       |
| <b>L-VLDL-TG (mmol/l)</b>            | 0.126 [0.084,0.194]       |
| <b>M-VLDL-P (mmol/l)</b>             | <0.0001 [<0.0001,<0.0001] |
| <b>M-VLDL-L (mmol/l)</b>             | 0.541 [0.411,0.703]       |
| <b>M-VLDL-PL (mmol/l)</b>            | 0.125 [0.093,0.159]       |
| <b>M-VLDL-C (mmol/l)</b>             | 0.172 [0.131,0.221]       |

|                            |                           |
|----------------------------|---------------------------|
| <b>M-VLDL-CE (mmol/l)</b>  | 0.096 [0.072,0.123]       |
| <b>M-VLDL-FC (mmol/l)</b>  | 0.077 [0.057,0.097]       |
| <b>M-VLDL-TG (mmol/l)</b>  | 0.235 [0.177,0.324]       |
| <b>S-VLDL-P (mmol/l)</b>   | <0.0001 [<0.0001,<0.0001] |
| <b>S-VLDL-L (mmol/l)</b>   | 0.370 [0.294,0.470]       |
| <b>S-VLDL-PL (mmol/l)</b>  | 0.093 [0.074,0.115]       |
| <b>S-VLDL-C (mmol/l)</b>   | 0.147 [0.115,0.184]       |
| <b>S-VLDL-CE (mmol/l)</b>  | 0.088 [0.069,0.113]       |
| <b>S-VLDL-FC (mmol/l)</b>  | 0.058 [0.046,0.072]       |
| <b>S-VLDL-TG (mmol/l)</b>  | 0.129 [0.099,0.172]       |
| <b>XS-VLDL-P (mmol/l)</b>  | <0.001 [<0.001,<0.001]    |
| <b>XS-VLDL-L (mmol/l)</b>  | 0.340 [0.287,0.403]       |
| <b>XS-VLDL-PL (mmol/l)</b> | 0.099 [0.083,0.118]       |
| <b>XS-VLDL-C (mmol/l)</b>  | 0.179 [0.150,0.215]       |
| <b>XS-VLDL-CE (mmol/l)</b> | 0.125 [0.105,0.150]       |
| <b>XS-VLDL-FC (mmol/l)</b> | 0.054 [0.045,0.065]       |
| <b>XS-VLDL-TG (mmol/l)</b> | 0.061 [0.050,0.075]       |
| <b>IDL-P (mmol/l)</b>      | <0.001 [<0.001,<0.001]    |
| <b>IDL-L (mmol/l)</b>      | 1.335 [1.141,1.532]       |
| <b>IDL-PL (mmol/l)</b>     | 0.316 [0.270,0.359]       |
| <b>IDL-C (mmol/l)</b>      | 0.923 [0.782,1.069]       |
| <b>IDL-CE (mmol/l)</b>     | 0.689 [0.582,0.797]       |
| <b>IDL-FC (mmol/l)</b>     | 0.235 [0.199,0.270]       |
| <b>IDL-TG (mmol/l)</b>     | 0.096 [0.082,0.113]       |
| <b>L-LDL-P (mmol/l)</b>    | 0.001 [0.001,0.001]       |
| <b>L-LDL-L (mmol/l)</b>    | 1.771 [1.513,2.046]       |
| <b>L-LDL-PL (mmol/l)</b>   | 0.390 [0.335,0.447]       |
| <b>L-LDL-C (mmol/l)</b>    | 1.286 [1.087,1.492]       |
| <b>L-LDL-CE (mmol/l)</b>   | 0.946 [0.801,1.097]       |
| <b>L-LDL-FC (mmol/l)</b>   | 0.337 [0.288,0.390]       |
| <b>L-LDL-TG (mmol/l)</b>   | 0.096 [0.082,0.112]       |
| <b>M-LDL-P (mmol/l)</b>    | <0.001 [<0.001,<0.001]    |
| <b>M-LDL-L (mmol/l)</b>    | 0.674 [0.561,0.797]       |
| <b>M-LDL-PL (mmol/l)</b>   | 0.178 [0.149,0.209]       |
| <b>M-LDL-C (mmol/l)</b>    | 0.465 [0.383,0.551]       |
| <b>M-LDL-CE (mmol/l)</b>   | 0.329 [0.268,0.394]       |
| <b>M-LDL-FC (mmol/l)</b>   | 0.134 [0.113,0.157]       |
| <b>M-LDL-TG (mmol/l)</b>   | 0.031 [0.026,0.037]       |
| <b>S-LDL-P (mmol/l)</b>    | <0.001 [<0.001,<0.001]    |
| <b>S-LDL-L (mmol/l)</b>    | 0.309 [0.265,0.354]       |
| <b>S-LDL-PL (mmol/l)</b>   | 0.097 [0.085,0.110]       |
| <b>S-LDL-C (mmol/l)</b>    | 0.197 [0.167,0.229]       |
| <b>S-LDL-CE (mmol/l)</b>   | 0.140 [0.119,0.164]       |
| <b>S-LDL-FC (mmol/l)</b>   | 0.057 [0.049,0.066]       |
| <b>S-LDL-TG (mmol/l)</b>   | 0.013 [0.011,0.016]       |
| <b>XL-HDL-P (mmol/l)</b>   | <0.001 [<0.001,<0.001]    |
| <b>XL-HDL-L (mmol/l)</b>   | 0.186 [0.143,0.250]       |
| <b>XL-HDL-PL (mmol/l)</b>  | 0.088 [0.062,0.123]       |
| <b>XL-HDL-C (mmol/l)</b>   | 0.093 [0.074,0.120]       |
| <b>XL-HDL-CE (mmol/l)</b>  | 0.068 [0.054,0.090]       |
| <b>XL-HDL-FC (mmol/l)</b>  | 0.025 [0.021,0.030]       |
| <b>XL-HDL-TG (mmol/l)</b>  | 0.006 [0.005,0.008]       |
| <b>L-HDL-P (mmol/l)</b>    | 0.002 [0.001,0.002]       |
| <b>L-HDL-L (mmol/l)</b>    | 0.773 [0.555,1.049]       |
| <b>L-HDL-PL (mmol/l)</b>   | 0.380 [0.277,0.510]       |
| <b>L-HDL-C (mmol/l)</b>    | 0.365 [0.256,0.509]       |

|                   |                        |
|-------------------|------------------------|
| L-HDL-CE (mmol/l) | 0.284 [0.198,0.396]    |
| L-HDL-FC (mmol/l) | 0.082 [0.058,0.114]    |
| L-HDL-TG (mmol/l) | 0.026 [0.019,0.034]    |
| M-HDL-P (mmol/l)  | 0.004 [0.004,0.005]    |
| M-HDL-L (mmol/l)  | 1.117 [0.984,1.263]    |
| M-HDL-PL (mmol/l) | 0.516 [0.459,0.580]    |
| M-HDL-C (mmol/l)  | 0.555 [0.481,0.639]    |
| M-HDL-CE (mmol/l) | 0.457 [0.397,0.523]    |
| M-HDL-FC (mmol/l) | 0.099 [0.084,0.115]    |
| M-HDL-TG (mmol/l) | 0.043 [0.034,0.055]    |
| S-HDL-P (mmol/l)  | 0.010 [0.009,0.011]    |
| S-HDL-L (mmol/l)  | 1.190 [1.108,1.281]    |
| S-HDL-PL (mmol/l) | 0.672 [0.626,0.725]    |
| S-HDL-C (mmol/l)  | 0.473 [0.439,0.508]    |
| S-HDL-CE (mmol/l) | 0.350 [0.323,0.378]    |
| S-HDL-FC (mmol/l) | 0.122 [0.114,0.132]    |
| S-HDL-TG (mmol/l) | 0.043 [0.034,0.054]    |
| XXL-VLDL-PL (%)   | 13.274 [8.935,15.3]    |
| XXL-VLDL-C (%)    | 30.365 [24.622,41.597] |
| XXL-VLDL-CE (%)   | 19.025 [14.686,27.758] |
| XXL-VLDL-FC (%)   | 11.195 [9.520,13.625]  |
| XXL-VLDL-TG (%)   | 55.776 [45.988,62.768] |
| XL-VLDL-PL (%)    | 17.495 [15.547,18.603] |
| XL-VLDL-C (%)     | 30.741 [26.553,36.569] |
| XL-VLDL-CE (%)    | 19.602 [15.571,24.523] |
| XL-VLDL-FC (%)    | 11.297 [10.468,12.318] |
| XL-VLDL-TG (%)    | 52.113 [46.332,56.723] |
| L-VLDL-PL (%)     | 18.805 [16.574,20.037] |
| L-VLDL-C (%)      | 28.746 [26.193,31.555] |
| L-VLDL-CE (%)     | 15.587 [13.458,17.815] |
| L-VLDL-FC (%)     | 13.297 [12.538,14.081] |
| L-VLDL-TG (%)     | 52.969 [49.459,56.300] |
| M-VLDL-PL (%)     | 22.60 [21.585,23.724]  |
| M-VLDL-C (%)      | 32.317 [28.221,35.810] |
| M-VLDL-CE (%)     | 18.332 [15.153,21.008] |
| M-VLDL-FC (%)     | 13.914 [12.924,14.919] |
| M-VLDL-TG (%)     | 45.142 [40.398,50.252] |
| S-VLDL-PL (%)     | 24.862 [23.728,26.131] |
| S-VLDL-C (%)      | 39.501 [36.600,42.086] |
| S-VLDL-CE (%)     | 23.805 [22.028,25.400] |
| S-VLDL-FC (%)     | 15.506 [14.326,16.797] |
| S-VLDL-TG (%)     | 35.592 [31.985,39.520] |
| XS-VLDL-PL (%)    | 29.019 [28.407,29.530] |
| XS-VLDL-C (%)     | 53.054 [50.720,55.272] |
| XS-VLDL-CE (%)    | 37.126 [35.073,39.184] |
| XS-VLDL-FC (%)    | 15.931 [15.631,16.183] |
| XS-VLDL-TG (%)    | 17.960 [16.172,20.088] |
| IDL-PL (%)        | 23.695 [23.141,24.142] |
| IDL-C (%)         | 69.234 [67.867,70.305] |
| IDL-CE (%)        | 51.597 [50.316,52.709] |
| IDL-FC (%)        | 17.521 [16.958,18.029] |
| IDL-TG (%)        | 7.198 [6.392,8.172]    |
| L-LDL-PL (%)      | 22.051 [21.708,22.411] |
| L-LDL-C (%)       | 72.415 [71.521,73.155] |
| L-LDL-CE (%)      | 53.368 [52.531,54.156] |
| L-LDL-FC (%)      | 19.083 [18.54,19.608]  |

|                      |                        |
|----------------------|------------------------|
| <b>L-LDL-TG (%)</b>  | 5.436 [4.836,6.219]    |
| <b>M-LDL-PL (%)</b>  | 26.574 [26.088,27.012] |
| <b>M-LDL-C (%)</b>   | 68.861 [67.968,69.514] |
| <b>M-LDL-CE (%)</b>  | 48.547 [47.226,49.86]  |
| <b>M-LDL-FC (%)</b>  | 20.272 [19.27,21.117]  |
| <b>M-LDL-TG (%)</b>  | 4.640 [4.146,5.362]    |
| <b>S-LDL-PL (%)</b>  | 31.634 [30.766,32.473] |
| <b>S-LDL-C (%)</b>   | 64.012 [62.971,64.781] |
| <b>S-LDL-CE (%)</b>  | 45.278 [44.318,46.373] |
| <b>S-LDL-FC (%)</b>  | 18.689 [17.847,19.269] |
| <b>S-LDL-TG (%)</b>  | 4.338 [3.800,5.072]    |
| <b>XL-HDL-PL (%)</b> | 46.963 [43.284,49.641] |
| <b>XL-HDL-C (%)</b>  | 49.476 [47.468,52.38]  |
| <b>XL-HDL-CE (%)</b> | 36.549 [35.414,38.157] |
| <b>XL-HDL-FC (%)</b> | 12.965 [11.703,14.776] |
| <b>XL-HDL-TG (%)</b> | 3.218 [2.475,4.553]    |
| <b>L-HDL-PL (%)</b>  | 48.89 [48.014,50.099]  |
| <b>L-HDL-C (%)</b>   | 47.826 [45.881,49.182] |
| <b>L-HDL-CE (%)</b>  | 37.264 [35.541,38.436] |
| <b>L-HDL-FC (%)</b>  | 10.608 [10.166,10.954] |
| <b>L-HDL-TG (%)</b>  | 3.217 [2.490,4.369]    |
| <b>M-HDL-PL (%)</b>  | 46.203 [45.647,46.776] |
| <b>M-HDL-C (%)</b>   | 49.909 [48.400,51.234] |
| <b>M-HDL-CE (%)</b>  | 41.068 [39.754,42.236] |
| <b>M-HDL-FC (%)</b>  | 8.848 [8.477,9.221]    |
| <b>M-HDL-TG (%)</b>  | 3.884 [3.025,4.902]    |
| <b>S-HDL-PL (%)</b>  | 56.611 [55.917,57.351] |
| <b>S-HDL-C (%)</b>   | 39.809 [38.687,40.689] |
| <b>S-HDL-CE (%)</b>  | 29.531 [28.461,30.414] |
| <b>S-HDL-FC (%)</b>  | 10.239 [9.956,10.605]  |
| <b>S-HDL-TG (%)</b>  | 3.598 [2.958,4.397]    |

Median [interquartile range].

Abbreviations: -C, cholesterol; -TG, triglycerides; -PL, Phospholipids; -CE, Cholesteryl esters; -FC, Free cholesterol; -L, Total lipids; -P, Lipoprotein particle concentrations; XXL-, Chylomicrons and extremely large; XL-, Very large; L-, Large; M-, Medium; S-, Small; XS- Very small; LA, Linoleic Acid; DHA, docosahexaenoic acid; FA, fatty acids; HDL, high-density lipoprotein; IDL, intermediate-density lipoproteins; LDL, low-density lipoprotein; MUFA, monounsaturated fatty acid; PUFA, polyunsaturated fatty acid; SFA, saturated fatty acid; VLDL, very low-density lipoprotein; VHDL, very high-density lipoprotein, %, Percentage.

**Supplementary Figure S1.** Plot of the 250 metabolites according to the percentage of missingness in 1250 participants.

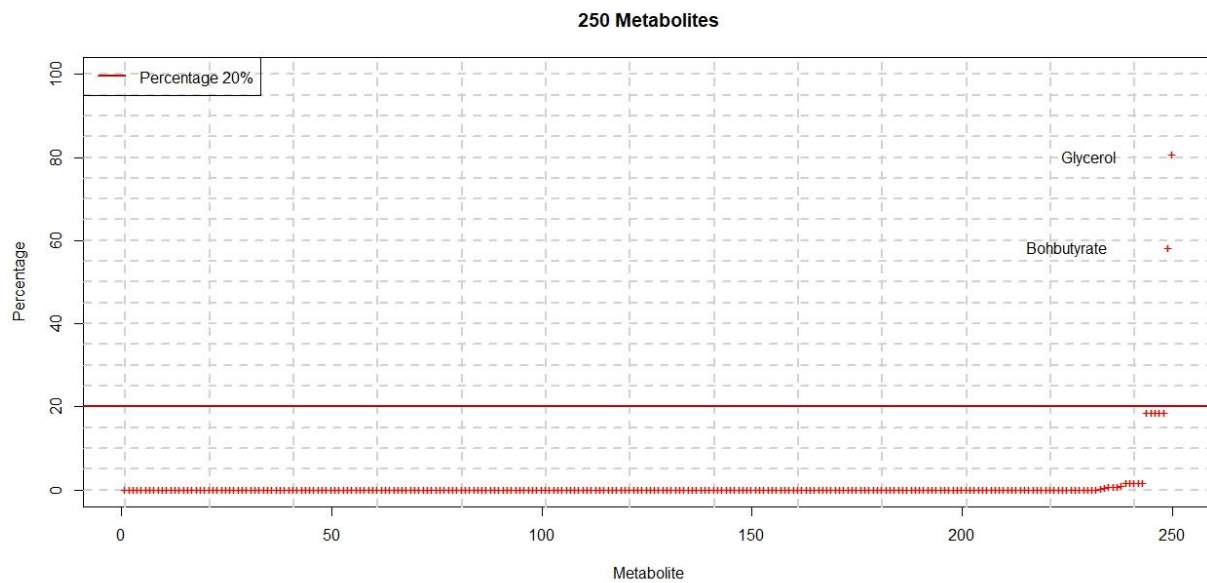

**Supplementary Figure S2.** Correlation matrix for all the 248 metabolites considered in the analysis. Colors represent directions of the correlation (blue-positive and red-inverse) while the color depth indicates correlation magnitudes (the darker the stronger).

**Supplementary Figure S3.** Plot of the lambda and Root Mean Square Error for different alpha values after the 10 iterations with the elastic net penalty. The colored dots are the alpha values.

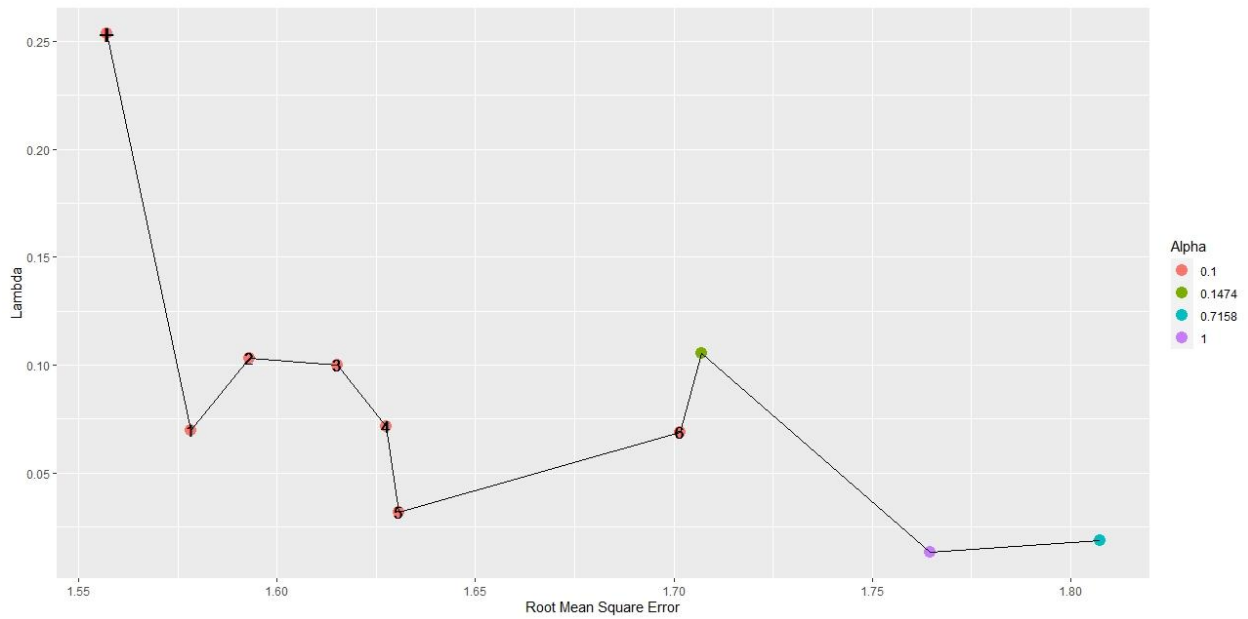

**Supplementary Figure S4.** Plot of the 200 simulated identified lambda for Alpha = 0.1. As the simulations increase the mean lambda converges to its value 0.0788.

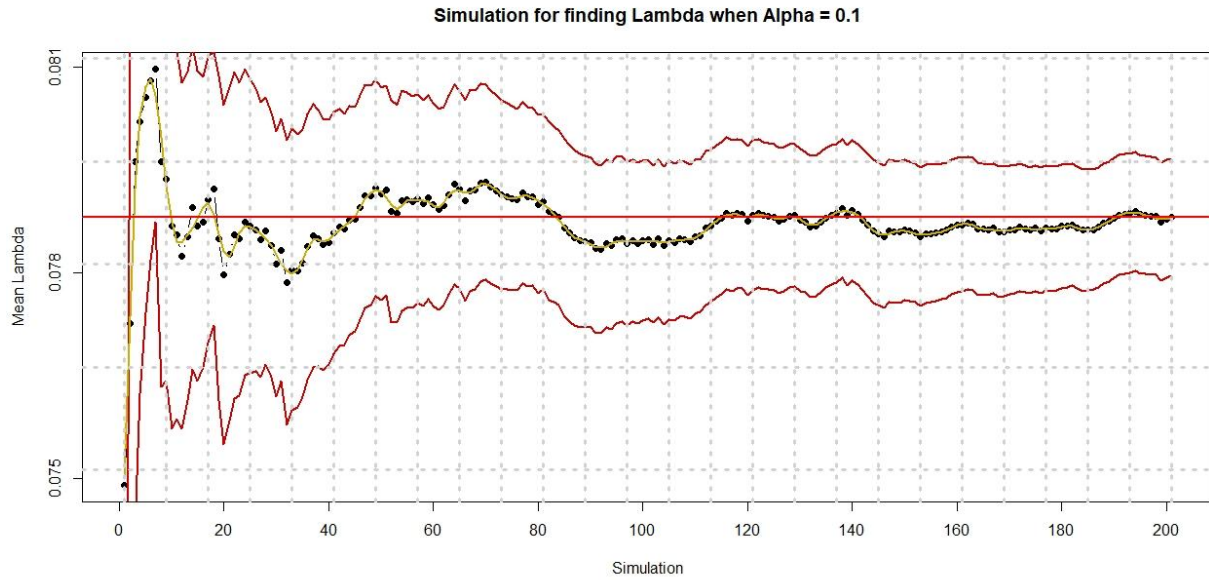

**Supplementary Figure S5.** Plot of the Mean-Squared Error as functions of  $\log(\lambda)$  for the 200 times 10-fold cross-validation regression analyses with the elastic net penalty. The orange line is the mean form the cross-validation and the shaded area represent 95% range confidence interval.

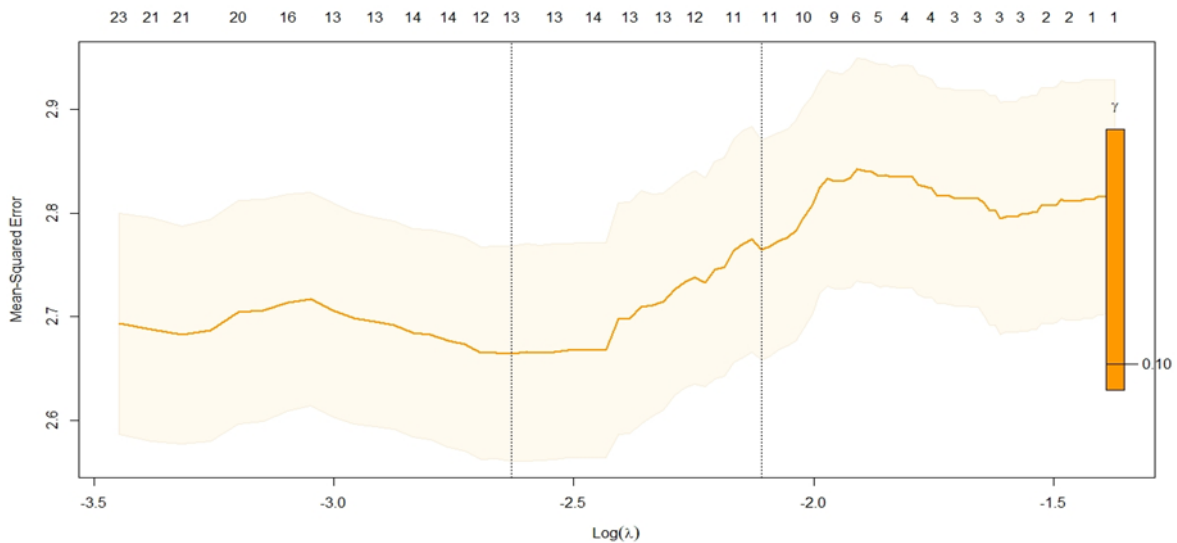



**Supplementary Figure S6.** Plot of the beta coefficients of metabolites in the model as functions of Lambda for the 10-fold cross-validation analyses with the elastic net penalty.

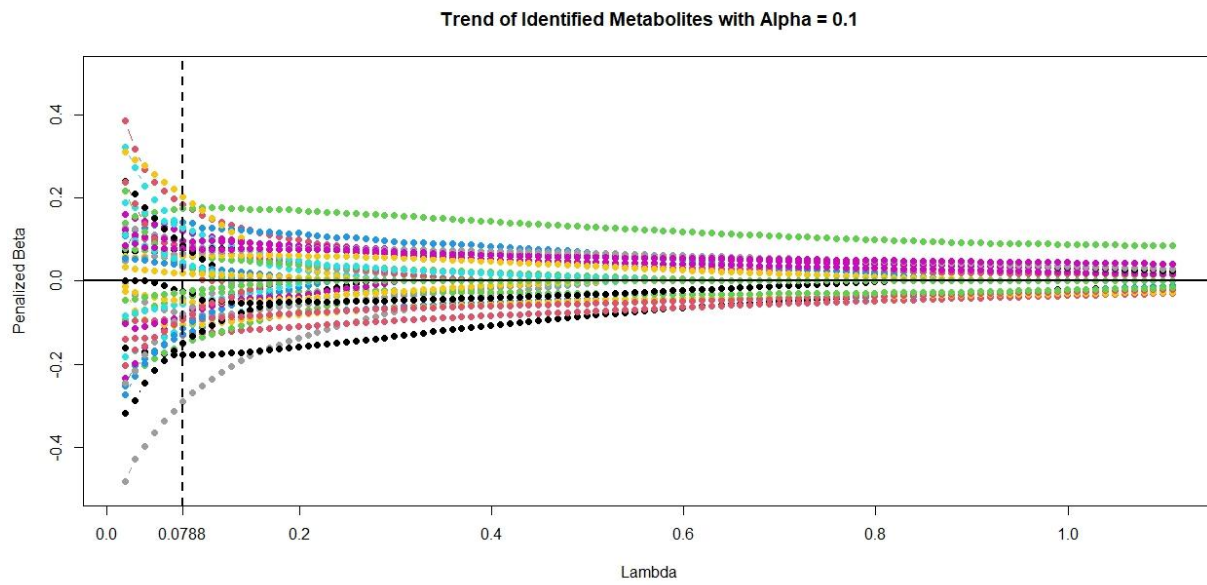

**Supplementary Table S2. Associations of MEDAS with cognitive performance scores.**

| Cognitive performance scores.              | MEDAS score |                   |         |
|--------------------------------------------|-------------|-------------------|---------|
|                                            | $\beta$     | Model<br>(95% CI) | P-Value |
| Trail Making Test (Part A) (seconds)       | -0.144      | (-0.525,0.237)    | 0.459   |
| Trail Making Test (Part B) (seconds)       | 0.257       | (-0.297,0.81)     | 0.363   |
| Verbal Fluency (Semantic) (counts)         | 0.133       | (-0.085,0.351)    | 0.232   |
| Verbal Fluency (Phonetic) (counts)         | 0.004       | (-0.131,0.139)    | 0.954   |
| Logical Memory (Immediate Recall) (counts) | -0.011      | (-0.177,0.155)    | 0.895   |
| Logical Memory (Delayed Recall) (counts)   | -0.007      | (-0.093,0.079)    | 0.875   |
| Cognitive Battery                          | 0.001       | (-0.018,0.021)    | 0.888   |

Regressions were adjusted for age (continuous), sex, education (primary and secondary school, high school, higher education), body mass index (BMI; continuous), smoking status (current, former or never smokers), alcohol consumption (never, less than once/month, 1–3 times/month, almost every day), recreational physical activity (measured in Metabolic Equivalents of Energy Expenditure (METs) per hour/week) (continuous).

Abbreviations: CI, Confidence Interval; MEDAS, Mediterranean Diet Adherence Screener.
