# Supplementary material for: Mediterranean diet related metabolite profiles and cognitive performance in a Greek population
Source: bioRxiv or medRxiv preprint supplement (doi:10.1101/2022.09.29.22280504), 2022-09-30

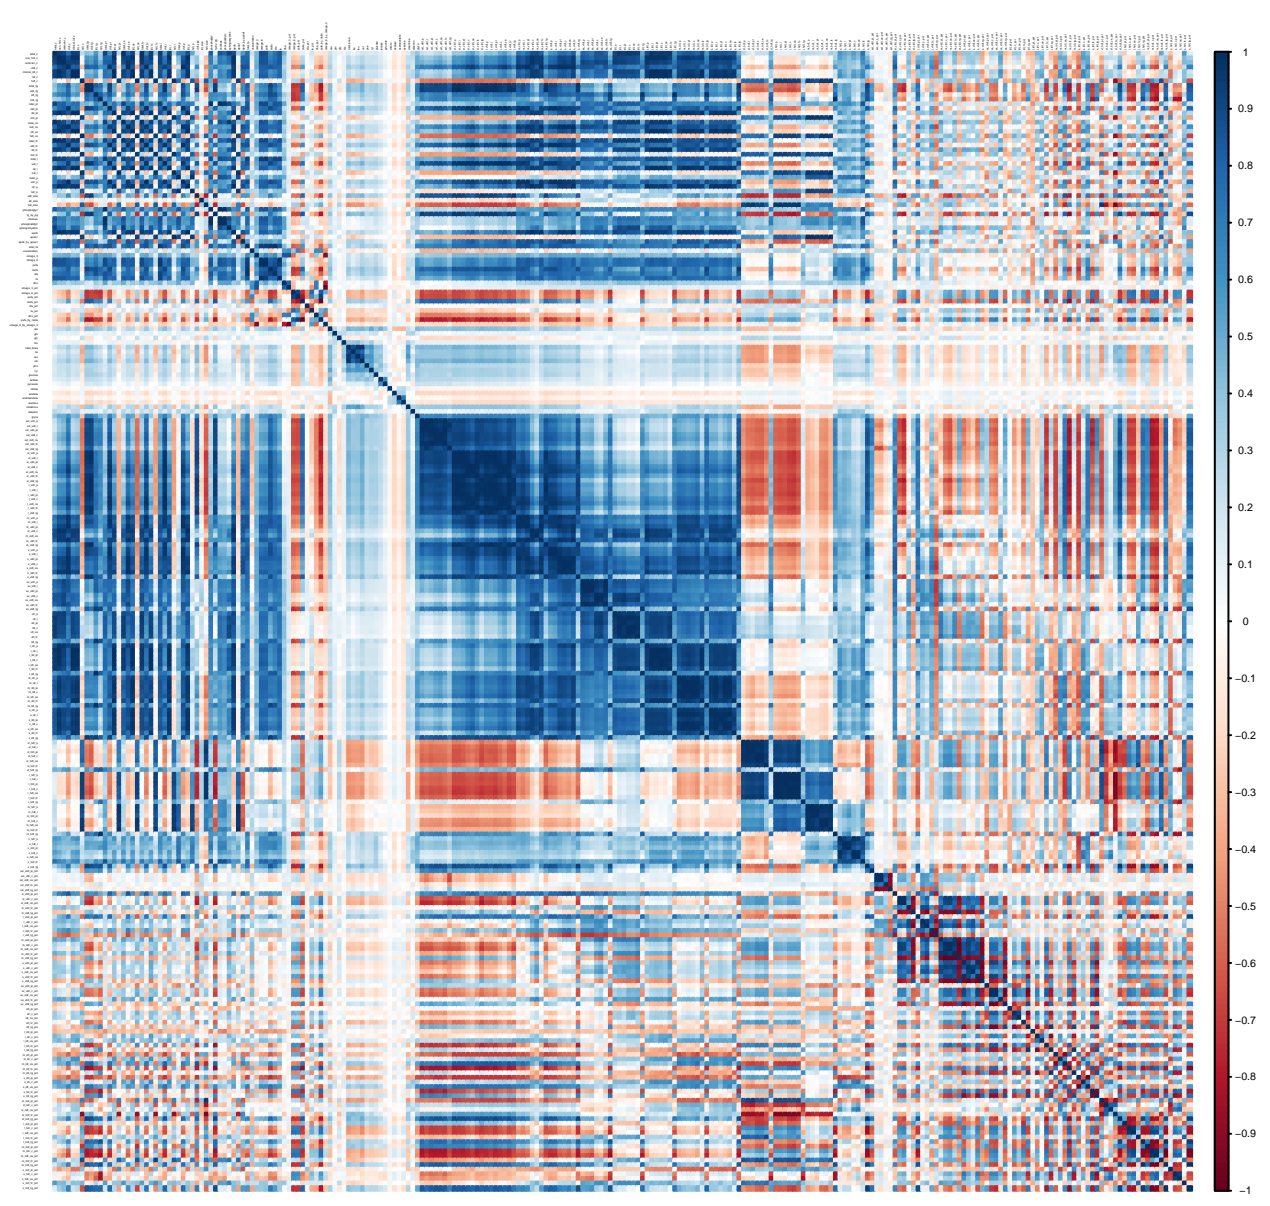

Supplement: Supplementary file [file media-3.pdf]
